# Supplementary material for: Empirical Myoelectric Feature Extraction and Pattern Recognition in Hemiplegic Distal Movement Decoding
Source: MDPI journal article supplement (doi:10.3390/bioengineering10070866), 2023-07-21
Supplement: s1 [file s1]

# Empirical Myoelectric Feature Extraction and Pattern Recognition in Hemiplegic Distal Movement Decoding

Alexey Anastasiev <sup>1</sup>, Hideki Kadone <sup>2,\*</sup>, Aiki Marushima <sup>3</sup>, Hiroki Watanabe <sup>3</sup>, Alexander Zaboronok <sup>3</sup>, Shinya Watanabe <sup>3</sup>, Akira Matsumura <sup>4</sup>, Kenji Suzuki <sup>5</sup>, Yuji Matsumaru <sup>3</sup> and Eiichi Ishikawa <sup>3</sup>

<sup>1</sup> Department of Neurosurgery, Graduate School of Comprehensive Human Sciences, University of Tsukuba, 1-1-1 Tennodai, Tsukuba 305-8575, Ibaraki, Japan; s1936046@s.tsukuba.ac.jp

<sup>2</sup> Center for Cybernics Research, Institute of Medicine, University of Tsukuba, 1-1-1 Tennodai, Tsukuba 305-8575, Ibaraki, Japan

<sup>3</sup> Department of Neurosurgery, Institute of Medicine, University of Tsukuba, Tennodai 1-1-1, Tsukuba 305-8575, Ibaraki, Japan; aiki.marushima@md.tsukuba.ac.jp (A.M.); watanabe.hiroki.gb@u.tsukuba.ac.jp (H.W.); a.zaboronok@md.tsukuba.ac.jp (A.Z.); shinya-watanabey@md.tsukuba.ac.jp (S.W.); yujimatsumaru@md.tsukuba.ac.jp (Y.M.); e-ishikawa@md.tsukuba.ac.jp (E.I.)

<sup>4</sup> Ibaraki Prefectural University of Health Sciences, 4669-2 Amicho, Inashiki 300-0394, Ibaraki, Japan; matsumura.akira.ft@alumni.tsukuba.ac.jp

<sup>5</sup> Center for Cybernics Research, Artificial Intelligence Laboratory, Faculty of Engineering Information and Systems, University of Tsukuba, 1-1-1 Tennodai, Tsukuba 305-8573, Ibaraki, Japan; kenji@ieee.org

\* Correspondence: kadone@ccr.tsukuba.ac.jp

## Supplementary sources

**Table S1.** Universal feature collector of time domain (TD), frequency domain (FD), time–frequency domain (TFD), fractal domain (FRD), and spatial domain (SD) features.

| Feature | Abbreviation                        | Parameters                                                                                                                                                                                      | Short description                                                                                                                                                                                                                                                                                                           |
|---------|-------------------------------------|-------------------------------------------------------------------------------------------------------------------------------------------------------------------------------------------------|-----------------------------------------------------------------------------------------------------------------------------------------------------------------------------------------------------------------------------------------------------------------------------------------------------------------------------|
| IEMG    | Integrated EMG parameter            | $\text{IEMG} = \sum_{n=1}^N  x_n $                                                                                                                                                              | IEMG shows the numerical summation of the absolute values of the EMG signals amplitude (point by point), which is used for motor unit firing sequences detection.                                                                                                                                                           |
| AAV     | Average amplitude value             | $\text{AAV} = \frac{1}{N} \sum_{n=1}^N x_n$                                                                                                                                                     | AAV is the basic time domain feature that calculates the average amplitude of the myoelectrical signal.                                                                                                                                                                                                                     |
| MAV     | Mean absolute value                 | $\text{MAV} = \frac{1}{N} \sum_{n=1}^N  x_n $                                                                                                                                                   | MAV is a generalized parameter of muscle contraction that reflects the average absolute value of the EMG signal's amplitude. MAV is primarily used to track muscle activity onset. As an elementary function, MAV is flexible for wide-range modifications thereby being ranked as the main feature in pattern recognition. |
| LMAV    | Log of the mean absolute value      | $\text{LMAV} = \log_e(\text{MAV})$                                                                                                                                                              | LMAV simulates the nonlinear scaling shape of the original MAV function. The feature enhances the window discrimination and orients on the low amplitude of the EMG signal.                                                                                                                                                 |
| MMAV1   | Modified mean absolute value type 1 | $\text{MMAV1} = \frac{1}{N} \sum_{n=1}^N w_n  x_n $<br>$w_n = \begin{cases} 1, & \text{if } 0.25N \leq n \leq 0.75N \\ 0.5, & \text{otherwise} \end{cases}$                                     | MMAV1 expands MAV potential using the weighting window function ( $w_n$ ) of a given frame signal segment in order to enhance pattern recognition.                                                                                                                                                                          |
| MMAV2   | Modified mean absolute value type 2 | $w_n = \begin{cases} 1, & \text{if } 0.25N \leq n \leq 0.75N \\ \frac{4n}{N}, & \text{if } n < 0.25N \\ \frac{4(n-N)}{N}, & \text{otherwise} \end{cases}$                                       | MMAV2 operates similarly to MMAV1; however, the feature implements the continuous weighted window function.                                                                                                                                                                                                                 |
| MMAV3   | Modified mean absolute value type 3 | $w_n = \frac{n}{N}$                                                                                                                                                                             | Additionally, the continuous range can be further modulated by specific window settings (MMAV3-MMAV6), which we have crafted during EMG acute stroke data decoding.                                                                                                                                                         |
| MMAV4   | Modified mean absolute value type 4 | $w_n = \begin{cases} \frac{N}{n} \\ 1 - \frac{n}{N} \end{cases}$                                                                                                                                |                                                                                                                                                                                                                                                                                                                             |
| MMAV5   | Modified mean absolute value type 5 | $w_n = \begin{cases} \frac{4n}{N}, & n < 0.25N \\ \frac{4n}{N} - 1, & 0.25N \leq n \leq 0.5N \\ \frac{4n}{N} - 2, & 0.5N \leq n \leq 0.75N \\ \frac{4n}{N} - 3, & \text{otherwise} \end{cases}$ |                                                                                                                                                                                                                                                                                                                             |

|                 |                                                                                            |                                                                                                                                                         |                                                                                                                                                                                                                                                                                                       |
|-----------------|--------------------------------------------------------------------------------------------|---------------------------------------------------------------------------------------------------------------------------------------------------------|-------------------------------------------------------------------------------------------------------------------------------------------------------------------------------------------------------------------------------------------------------------------------------------------------------|
| <b>MMAV6</b>    | Modified mean absolute value type 6                                                        | $w_n = \begin{cases} n < \frac{3}{8}N \\ \frac{3}{8}N < n < \frac{5}{8}N \\ n > \frac{5}{8}N, \text{ otherwise} \end{cases}$                            |                                                                                                                                                                                                                                                                                                       |
| <b>MAVS</b>     | Mean absolute value slope                                                                  | $\text{MAVS}_i = \text{MAV}_{i+1} - \text{MAV}_i$ $i = 1, \dots, I - 1$                                                                                 | MAVS calculates the difference in a set of adjacent MAV segments, whereas the number of segments (I) can be specified depending on the intended signal representation.                                                                                                                                |
| <b>EMAV</b>     | Enhanced mean absolute value                                                               | $\text{EMAV} = \frac{1}{N} \sum_{n=1}^N  (x_n)^p $ $p = \begin{cases} 0.75, \text{ if } \geq 0.2N \& n \leq 0.8N \\ 0.5, \text{ otherwise} \end{cases}$ | EMAV is a MAV temporal modification that enhances the feature performance due to the translation of EMG signal length content onto the middle range of the segment. p is the parameter of enhanced mean absolute value.                                                                               |
| <b>SSI</b>      | Simple square integral                                                                     | $\text{SSI} = \sum_{n=1}^N  x_n ^2$                                                                                                                     | SSI is the sum of squared parameters of signal amplitude that imprints the EMG signal energy.                                                                                                                                                                                                         |
| <b>LSSI</b>     | Log of the simple square integral                                                          | $\text{LSSI} = \log \sum_{n=1}^N  x_n ^2$                                                                                                               | LSSI evaluates SSI (EMG signal energy) in the logarithmic scale to highlight weak low-amplitude components of the signal.                                                                                                                                                                             |
| <b>HPA, VAR</b> | Hjorth parameter activity; variance of the EMG                                             | $\text{HPA} = \text{VAR}(x) = \frac{1}{N-1} \sum_{n=1}^N x_n^2$                                                                                         | VAR is a power index of the EMG signal that monitors muscle contracture. HPA (or VAR) is the variance of the EMG signal and represents the total energy of the signal.                                                                                                                                |
| <b>LVAR</b>     | Log of variance                                                                            | $\text{LVAR} = \log(\text{VAR})$                                                                                                                        | LVAR is a non-linear transformation of the VAR feature.                                                                                                                                                                                                                                               |
| <b>HPM</b>      | Hjorth parameter mobility                                                                  | $\text{HPM} = \sqrt{\frac{\text{VAR}\left(\frac{dx(n)}{dn}\right)}{\text{VAR}(x_n)}}$                                                                   | HPM is the standard deviation of the derivative of the signal, normalized by the variance of the signal (HPA). This feature measures the rate of change of the EMG signal.                                                                                                                            |
| <b>HPC</b>      | Hjorth parameter complexity                                                                | $\text{HPC} = \sqrt{\frac{\text{HPM}\left(\frac{dx(n)}{dn}\right)}{\text{HPM}(x_n)}}$                                                                   | The third dimensionless Hjorth's parameter (HPC) is the standard deviation of the derivative of the mobility, normalized by the mobility (HPM). HPC measures the rate of change of the given EMG signal length and gives an indication of the complexity of the signal (similar to a pure sine wave). |
| <b>TM3-5</b>    | Absolute value of 3 <sup>rd</sup> , 4 <sup>th</sup> , and 5 <sup>th</sup> temporal moments | $\text{TM}_m = \left  \frac{1}{N} \sum_{n=1}^N x_n^m \right , m=3, 4, 5$                                                                                | TM3, TM4, and TM5 represent the high-order statistical baseline for classification.                                                                                                                                                                                                                   |
| <b>MSKEW1</b>   | Modified skewness type 1                                                                   | $\text{MSKEW1} = \frac{N}{(N-1)(N-2)\sigma^3} \sum_{n=1}^N (x_n - \mu)^3$                                                                               | MSKEW1 is the simple skewness based on quartile evaluation. This feature measures the asymmetry of the amplitude of the EMG signal which represents normal Gaussian distribution. $\mu$ is the mean (average) of the distribution of the given signal; $\sigma$ is the standard deviation.            |
| <b>MSKEW2</b>   | Modified skewness type 2                                                                   | $\text{MSKEW2} = \frac{\mu - q_{0.5}}{E[ x - \mu ]}$                                                                                                    | MSKEW2 is a skewness based on mean-median difference, standardized by absolute deviation. E represents the expected value or the mean of the cumulative distribution function of the data.                                                                                                            |

|                 |                                                                                                   |                                                                                                                                                                                    |                                                                                                                                                                                                                                                                                                                                                                |
|-----------------|---------------------------------------------------------------------------------------------------|------------------------------------------------------------------------------------------------------------------------------------------------------------------------------------|----------------------------------------------------------------------------------------------------------------------------------------------------------------------------------------------------------------------------------------------------------------------------------------------------------------------------------------------------------------|
| <b>MSKEW3</b>   | Modified skewness type 3                                                                          | $\text{MSKEW3} = \frac{\mu - q_{0.5}}{\sigma}$                                                                                                                                     | MSKEW3 is a skewness based on mean-median difference, standardized by standard deviation. $q_{0.5}$ is the interquartile range of the dispersion of the 50 <sup>th</sup> percentile or the median, $\sigma$ is the standard deviation.                                                                                                                         |
| <b>KURT</b>     | Kurtosis                                                                                          | $\text{KURT} = \frac{M_4}{(M_2)^2}$ $M_k = \frac{1}{N} \sum_{n=1}^N (x_n - \bar{x})^k$                                                                                             | KURT provides a measurement of isometric muscle contractions that do not depend on EMG signal amplitude. In the scope of signal processing, KURT identifies the statistical distribution shape of a signal versus a normal Gaussian distribution.                                                                                                              |
| <b>MKURT</b>    | Modified kurtosis                                                                                 | $\text{MKURT} = \frac{(q_{0.875} - q_{0.625}) + (q_{0.375} - q_{0.125})}{q_{0.75} - q_{0.25}}$                                                                                     | MKURT is the octile-based measurement of kurtosis.                                                                                                                                                                                                                                                                                                             |
| <b>RMSV2-3</b>  | The value of root mean square of 2 <sup>nd</sup> and 3 <sup>rd</sup> order                        | $\text{RMSV}_Y = \left( \frac{1}{N} \sum_{n=1}^N x_n^Y \right)^{\frac{1}{Y}}$                                                                                                      | In the prism of signal processing, RMS is a Gaussian random process within certain amplitude modulation that shows constant muscle force or its synchronization during certain activity.                                                                                                                                                                       |
| <b>LRMSV2-3</b> | Log of the 2 <sup>nd</sup> and 3 <sup>rd</sup> order root mean square                             | $\text{LRMSV}_Y = \log \left( \frac{1}{N} \sum_{n=1}^N x_n^Y \right)^{\frac{1}{Y}}$                                                                                                | The logarithmic conversion of the RMS is able to deviate the feature-specific difference thereby is able to enhance the prediction of certain muscle events.                                                                                                                                                                                                   |
| <b>RSM0</b>     | Root squared zero order moment                                                                    | $\text{RSM}_0 = \sqrt{\sum_{n=1}^{N-1} x_n^2}$                                                                                                                                     | Analogically to RMS, root squared zero order moment estimates the total signal power which reflects the strength of certain muscle contractions.                                                                                                                                                                                                               |
| <b>RSD1</b>     | First-order root squared normalized descriptor                                                    | $\text{RSD1} = \frac{1}{N} \sum_{n=0}^{N-1} D x_1[n]^2$                                                                                                                            | RSD1 is the first difference in approximate derivatives $D x_1$ of the EMG signal in every window obtained from the value difference of adjacent elements $x_n$ .                                                                                                                                                                                              |
| <b>RSD2</b>     | Second-order squared normalized descriptor                                                        | $\text{RSD2} = \frac{1}{N} \sum_{n=0}^{N-1} D x_2[n]^2$                                                                                                                            | RSD2 uses second difference derivates $D x_2$ , but the same calculation procedure as RSD1. Both RSD1 and RSD2 features measure the spectral information of the muscle force from the EMG.                                                                                                                                                                     |
| <b>ASR</b>      | The absolute value of the summation of square root                                                | $\text{ASR} = \left  \sum_{n=1}^N (x_n)^{\frac{1}{2}} \right $                                                                                                                     | ASR is the integral of the rectified EMG signal, which is supposed to be retaining the entire energy characteristics of the given signal.                                                                                                                                                                                                                      |
| <b>MSR</b>      | The mean value of square root                                                                     | $\text{MSR} = \frac{1}{N} \sum_{n=1}^N ( x_n )^{\frac{1}{2}}$                                                                                                                      | MSR estimates the total amount of myoelectrical activity per window of the EMG signal.                                                                                                                                                                                                                                                                         |
| <b>ASM</b>      | The absolute value of the summation of the exp <sup>th</sup> root of the signal data and its mean | $\text{ASM} = \left  \frac{\sum_{n=1}^N (x_n)^a}{N} \right $ $a = \begin{cases} 0.5, & \text{if } (n \geq 0.25N \text{ and } n \leq 0.75) \\ 0.75, & \text{otherwise} \end{cases}$ | ASM measures the approximate signal's amplitude of the given EMG waveform that returns the rectified sum conformation of muscle burst per unit of time. In mathematical definition, ASM is a modification of RSMV2 and WL in which the exp variable is predefined within two possible meanings of 0.5 or 0.75 depending on the characteristics of signal data. |

|              |                                                        |                                                                                                                                                                    |                                                                                                                                                                                                                                        |
|--------------|--------------------------------------------------------|--------------------------------------------------------------------------------------------------------------------------------------------------------------------|----------------------------------------------------------------------------------------------------------------------------------------------------------------------------------------------------------------------------------------|
| <b>MANC</b>  | Mean absolute Napier's constant value                  | $\text{MANC} = \left  \frac{1}{N} \sum_{n=1}^N x_n^e \right $                                                                                                      | An EMG signal with a higher value of MANC is more complex, while a lower value indicates simplicity.                                                                                                                                   |
| <b>SD</b>    | Standard deviation                                     | $\text{SD} = \sqrt{\frac{1}{N} \sum_{n=1}^N (x_n - \bar{x})^2}$                                                                                                    | SD similarly to RMS is defined as a value of the square root of the variance. In which x is the average amplitude value of the signal.                                                                                                 |
| <b>LOG</b>   | Log detector                                           | $\text{LOG} = e^{\frac{1}{N} \sum_{n=1}^N \log( x_n )}$                                                                                                            | Non-linear detector LOG estimates the grade of muscle contraction.                                                                                                                                                                     |
| <b>ROG</b>   | Root mean squared normalized value of the log detector | $\text{ROG} = \sqrt{\frac{1}{N} e^{\frac{1}{N} \sum_{n=1}^N \log( x_n )}}$                                                                                         | ROG similar to LOG is a nonlinear feature that is focused on the estimation of total muscular contraction per window unit at the absolute scale to enlarge the scope of the myoelectrical content.                                     |
| <b>MDV</b>   | Median differential value                              | $\text{MDV} = \text{median}( x_{n+1} - x_n )$                                                                                                                      | MDV is the difference between the median of the signal and the median of the first difference of the EMG signal                                                                                                                        |
| <b>MPD</b>   | Median power difference value                          | $\text{MPD} = \text{median}( x_{n+1}  -  x_n )^2$                                                                                                                  | MPD estimates the Gaussian noise passage in the nearby continuous signal data.                                                                                                                                                         |
| <b>DASDV</b> | Difference absolute standard deviation value           | $\text{DASDV} = \sqrt{\frac{1}{N-1} \sum_{n=1}^{N-1} (x_{n+1} - x_n)^2}$                                                                                           | DASDV is a standard deviation of the WL feature that is likewise waveform indicates the complexity of the myoelectrical signal.                                                                                                        |
| <b>MFL</b>   | Maximum fractal length                                 | $\text{MFL} = \log_{10} \sqrt{\sum_{n=1}^{N-1} (x(n+1) - x(n))^2}$                                                                                                 | MFL is a logarithmic feature that analyzes the EMG signal fractal length. MFL is used as a navigation feature for tracking low-grade bound muscle activity.                                                                            |
| <b>WL</b>    | Waveform length                                        | $\text{WL} = \sum_{n=1}^{N-1}  x_{n+1} - x_n $                                                                                                                     | WL is the complexity parameter aggregating the length, amplitude, and frequency of the given signal's time-series segment. WL is the elongation of the IEMG parameter that shows the cumulative span of the waveform over the segment. |
| <b>WLR</b>   | Waveform length ratio                                  | $\text{WLR} = \log \left( \frac{\sum_{n=1}^N  x_{n+1} - x_{n-1} }{\sum_{n=1}^N  x_{n+2} - x_{n+2} } \right)$                                                       | WLR is the WL modification that composes the ratio of the first and second derivatives of the waveform length in the non-linear scale, which is described to be less variant to the amplitude scaling of the EMG signal.               |
| <b>AAC</b>   | Average amplitude change                               | $\text{AAC} = \frac{1}{N} \sum_{n=1}^{N-1}  x_{n+1} - x_n $                                                                                                        | AAC estimates the absolute difference between the surrounding EMG data segments represented as waveform length.                                                                                                                        |
| <b>EWL</b>   | Enhanced wavelength                                    | $\text{EWL} = \sum_{n=2}^N  (x_n - x_{n-1})^p $<br>$p = \begin{cases} 0.75, & \text{if } \geq 0.2N \text{ \& } n \leq 0.8N \\ 0.5, & \text{otherwise} \end{cases}$ | EWL (as EMAV) prioritizes the area within the middle segment of the wavelength to enhance the interpretation of the signal. p is the parameter of the enhanced wavelength feature.                                                     |

|             |                                       |                                                                                                                                                                      |                                                                                                                                                                                                                                                                                                                                                                                   |
|-------------|---------------------------------------|----------------------------------------------------------------------------------------------------------------------------------------------------------------------|-----------------------------------------------------------------------------------------------------------------------------------------------------------------------------------------------------------------------------------------------------------------------------------------------------------------------------------------------------------------------------------|
| <b>NSV</b>  | Non-linear scaled value               | $NSV = \log_e \left( \sqrt{\frac{1}{N} \sum_{n=1}^N ( \bar{x}  -  x_n ^{1/3})^2} \right)$                                                                            | NSV is tuned to disclose the non-linear deviation of the LMAV function in order to represent the low amplitude EMG signal rather than the high range.                                                                                                                                                                                                                             |
| <b>ZC</b>   | Zero crossing                         | $ZC = \sum_{n=1}^{N-1} zcf(x_n)$ $zcf(x_n) = \begin{cases} 1, & \text{if } x_n x_{n+1} < 0 \\ 0, & \text{otherwise} \end{cases}$                                     | ZC counts the positive-to-negative ratio within a certain period of the signal length amplitude and stores the value as a feature. ZC measures the signal frequency change in the time domain and requires threshold values L to avoid false positives and isolate the signal noise.                                                                                              |
| <b>SSC</b>  | Slope sing change                     | $SSC = \sum_{n=2}^{N-1} sscf[(x_n - x_{n-1})(x_n - x_{n+1})]$ $sscf(x) = \begin{cases} 1, & \text{if } x \geq \text{threshold} \\ 0, & \text{otherwise} \end{cases}$ | SSC returns the number of slope sign changes of the three proximate signal segments. The feature demands a threshold for optimizing statistical output and avoiding the background noise artifacts of the EMG.                                                                                                                                                                    |
| <b>IRF</b>  | Irregularity factor                   | $IRF = \frac{ZC}{SSC}$                                                                                                                                               | IRF as a function captures the ratio between the number of times when the signal crosses through zero value divided by a number of peaks (the number when the sign of signal slope changes).                                                                                                                                                                                      |
| <b>WAMP</b> | Willison amplitude                    | $WAMP = \sum_{n=1}^{N-1} f( x_n - x_{n+1} )$ $f(x) = \begin{cases} 1, & \text{if } x \geq \text{threshold} \\ 0, & \text{otherwise} \end{cases}$                     | Alike to ZC, WAMP dissects frequency parameters in the time-domain spectrum. However, WAMP evaluates the amplitude difference of pair adjacent time-series segments of the signal that exceeds the threshold bounds in order to diminish myoelectrical noise. The given principle is used for monitoring the motor unit action potentials and assessing muscle contraction grade. |
| <b>MYOP</b> | Myopulse percentage rate              | $MYOP = \frac{1}{N} \sum_{n=1}^N f( x_n )$ $f(x) = \begin{cases} 1, & \text{if } x \geq \text{threshold} \\ 0, & \text{otherwise} \end{cases}$                       | MYOP is a dimensionless average parameter of the myopulse output in the EMG signal, in which absolute values if exceeding the pre-defined threshold are returned as one and stored as a feature.                                                                                                                                                                                  |
| <b>ER</b>   | Multi-channel energy ratio of the EMG | $E_j = \sum_{n=1}^N x_n^2(ch_j); j = 2, \dots, M-1, k = j + 1, \dots, M$ $ER_{jk} = \frac{E_j E_1}{E_k^2}$                                                           | ER measures the ratio of the absolute energy distribution between the pairs of EMG channels. The energy ratio is normalized by the following channel (starting from the first) of the binary ratio evaluation.                                                                                                                                                                    |
| <b>LER</b>  | Log of multi-channel energy ratio     | $LER = \log(ER)$                                                                                                                                                     | LER is the log of the energy of each binary channel ratio.                                                                                                                                                                                                                                                                                                                        |
| <b>MER</b>  | Mean energy ratio of the EMG          | $MER = \frac{1}{M} \sum_{j=1}^M ER_j$                                                                                                                                | MER returns the average energy ratio between the EMG channels.                                                                                                                                                                                                                                                                                                                    |
| <b>MLER</b> | Log of mean energy ratio              | $MLER = \log(MER)$                                                                                                                                                   | MLER is the logarithmic version of the MER feature.                                                                                                                                                                                                                                                                                                                               |

|               |                                                                              |                                                                                                      |                                                                                                                                                                                                                                                                                                                                             |
|---------------|------------------------------------------------------------------------------|------------------------------------------------------------------------------------------------------|---------------------------------------------------------------------------------------------------------------------------------------------------------------------------------------------------------------------------------------------------------------------------------------------------------------------------------------------|
| <b>MXR</b>    | Max energy ratio of the EMG                                                  | $MXR = \max(ER)$                                                                                     | MXR is the max value in the absolute energy ratio between the EMG channels.                                                                                                                                                                                                                                                                 |
| <b>LMXR</b>   | Log of max energy ratio                                                      | $LMXR = \log(MXR)$                                                                                   | Like LER and MXR, the LMXR feature is the log version of the max energy ratio of the EMG.                                                                                                                                                                                                                                                   |
| <b>MHW</b>    | Multiple hamming windows                                                     | $MHW = \sum_{n=1}^N (W_n x_n)^2$                                                                     | MHW segments the myoelectrical signal into overlapped windows and computes the EMG signal's energy difference over these time series. $W_n$ is the width of the Hamming window function.                                                                                                                                                    |
| <b>MTW</b>    | Multiple trapezoidal windows                                                 | $MTW_k = \sum_{n=1}^{N-1} (W_{n-n_k} x_n^2), k = 1, 2, 3$                                            | MTW operates similarly to MHW, but the window parameters have a trapezoidal shape. $n_k$ is the starting point of the k-th trapezoid window.                                                                                                                                                                                                |
| <b>HIST</b>   | Simple histogram of EMG                                                      |                                                                                                      | HIST disintegrates the EMG signal range into equally spaced numerical segments. Following a simple histogram design, we used four segments.                                                                                                                                                                                                 |
| <b>SAHT</b>   | Square root simple histogram                                                 |                                                                                                      | SAHT is the HIST equivalent using square root parameters of the segmented components.                                                                                                                                                                                                                                                       |
| <b>AR2-6</b>  | Autoregressive coefficients from 2 <sup>nd</sup> to 6 <sup>th</sup> order    | $x_n = - \sum_{p=1}^P a_p x_{n-p} + w_n; P = 2, 3, 4, 5, 6$                                          | A predictive autoregressive model (AR) with a certain order (P) represents every EMG signal datapoint in a linear combination of previous temporal EMG samples ( $x_{n-p}$ ) and white noise error term ( $w_n$ ). High-dimensional return values of that function are aggregated in a feature vector (autoregressive coefficients $a_p$ ). |
| <b>CCAR</b>   | Cepstral coefficients derived from the AR model                              | $CCAR = c_p; c_1 = -a_1$<br>$c_p = -a_p - \sum_{l=1}^{p-1} \left(1 - \frac{l}{p}\right) a_p c_{p-l}$ | CCARS is the inverse Fourier transform model magnitude of the power spectrum in the logarithmic scale of the signal. In analogy to AR, CCAR uses auto-regressive coefficients to convert them into a feature vector with the set order conditions ( $1 \leq l \leq p$ ). In our settings, the order was set to 3.                           |
| <b>LPC2-6</b> | Linear predictive coefficients from 2 <sup>nd</sup> to 6 <sup>th</sup> order | $x_n = b_0 + b_1 x_n + b_2 (x_n - 1) \dots + b_6 (x_n - 5)$<br>$LPC = [b_0, b_1, b_2 \dots b_6]$     | LPC is a transfer function of the AR prediction model in which linear predictive coefficients rely on the calculation of the gain function for each order cycle, not the recurrent autoregressive coefficients.                                                                                                                             |
| <b>LCARD</b>  | Logarithmic cardinality of the EMG signal                                    | The feature's threshold is set to 0.001.                                                             | In contrast to the original cardinality used in myoelectric pattern recognition, LCARD examines the number of unique values in the time-series set of the EMG signal in a non-linear fashion.                                                                                                                                               |
| <b>PERC1</b>  | Percentile type 1                                                            | $card\{x_n / x_n < PERC75\} = \frac{75N}{100}$                                                       | PERC1 is the converted 75 <sup>th</sup> percentile signal distribution. In the following definition, the <i>card</i> is the number of initial values in the given EMG signal range.                                                                                                                                                         |
| <b>PERC2</b>  | Percentile type 2                                                            | $card\{x_n / x_n < PERC50\} = \frac{50N}{100}$                                                       | 50 <sup>th</sup> percentile signal distribution was set as a feature (PERC2) during the empirical examination.                                                                                                                                                                                                                              |
| <b>SEN</b>    | Sample entropy                                                               | $SEN(x, m, r) = -\ln\left(\frac{A^m(r)}{B^m(r)}\right)$                                              | SEN evaluates the signal complexity independent of the length of the time-series events, which is practical and used in muscle onset detection. In the described definition m is the maximum epoch length, r is the tolerance parameter, $A^m(r)$ and $B^m(r)$ reflect the dimensions of m+1 and m.                                         |

|                 |                                                |                                                                                                                                                                                                                                  |                                                                                                                                                                                                                                                                                                                                                                                                                                                                                                                               |
|-----------------|------------------------------------------------|----------------------------------------------------------------------------------------------------------------------------------------------------------------------------------------------------------------------------------|-------------------------------------------------------------------------------------------------------------------------------------------------------------------------------------------------------------------------------------------------------------------------------------------------------------------------------------------------------------------------------------------------------------------------------------------------------------------------------------------------------------------------------|
| <b>AEN</b>      | Approximate entropy                            | $AEN_{(m,r,N)} =  \Phi^m(r) - \Phi^{m+1}(r) $ $\Phi^m(r) = (N - m + 1)^{-1} \sum_{n=1}^{N-m+1} \log C_n^m(r)$ $C_n^m(r) = \frac{N_n^m}{N - m + 1}$                                                                               | AEN measures the signal model complexity. This entropy quantifies the amount of regularity and the unpredictability of fluctuations over time series in muscle fatigue detection and points to the trigger muscle events. $C_n^m(r)$ is the correlation sum. $N_n^m$ is the number of data points with threshold conditions necessary for the computation of the $C_n^m(r)$ .                                                                                                                                                 |
| <b>FEN</b>      | Fuzzy entropy                                  | $FEN(N, m, r) = \lim_{N \rightarrow +\infty} (\ln \Phi_m - \phi_{m+1})$ $\phi_m = 1 / (N - m) \sum_{n=1}^{N-m} [1 / (N - m - 1)] \sum_{p=1, p \neq n}^{N-m} D_{n,p}^m$ $D_{n,p}^m = \exp \left( - \frac{(d_{n,p})^m}{r} \right)$ | FEN measures quantify of time series regularity which extrapolates the EMG signal's complexity degree in terms of fuzziness. $\Phi_m$ is the value of the mean average similarity. N is the sample set, m shows the used dimensions of the data sample, $D_{np}^m$ is a degree of similarity within two samples, and r is an amplitude of the exponential parameter of the $D_{np}^m$ .                                                                                                                                       |
| <b>PEN</b>      | Permutation entropy                            | $H(n) = \sum_{\pi=1}^{n!} p(\pi) \ln(p(\pi))$                                                                                                                                                                                    | PEN is similar to FEN in detecting the relative occurrences of the various trends in the signal, but its distribution patterns in the entropy model are considered (returns sorted data structure with the ascending order in the multi-dimensional shape). In the definition, the new sequence of performed permutations and combinations of the n-dimensional feature vector is n! whereas $\pi$ is the different permutation modus, and $p(\pi)$ references the probability statistics of n! within the whole time series. |
| <b>MASP</b>     | Modified amplitude spectrum of the EMG signal  | $MASP_{(m)} = \sum_{k=k_m}^M \frac{ fft_k }{k_m}$                                                                                                                                                                                | MASP groups the power frequency bins k into five equitable segments and concatenates the average values of every EMG channel into a single feature.                                                                                                                                                                                                                                                                                                                                                                           |
| <b>MLASP</b>    | Non-scale modified amplitude of the EMG signal | $MLASP_{(m)} = \sum_{k=k_m}^M \frac{\log fft_k }{k_m}$                                                                                                                                                                           | MLASP is the non-scale feature of MASP in which five equal segments of frequency bins have been converted into log values.                                                                                                                                                                                                                                                                                                                                                                                                    |
| <b>MNF</b>      | Mean frequency                                 | $MNF = \sum_{j=1}^M f_j P_j / \sum_{j=1}^M P_j$                                                                                                                                                                                  | MNF is the mean frequency domain value of the signal power spectrum. MNF can be expressed as the sum of multiplied quantities of the EMG power spectrum, and the frequency divided by the total value of the spectral intensity.                                                                                                                                                                                                                                                                                              |
| <b>MMNF</b>     | Modified mean frequency                        | $MMNF = \sum_{j=1}^M f_j A_j / \sum_{j=1}^M A_j$                                                                                                                                                                                 | MMNF is the average frequency value obtained from the amplitude spectrum. In the following description, $f_j$ is the frequency parameter of the signal's spectrum at the fixed frequency bin j.                                                                                                                                                                                                                                                                                                                               |
| <b>MDF</b>      | Median frequency                               | $MDF = \frac{1}{2} \sum_{j=1}^M P_j$                                                                                                                                                                                             | MDF feature divides the spectrum of the signal into two parts with the same quantity amplitude.                                                                                                                                                                                                                                                                                                                                                                                                                               |
| <b>MMDF</b>     | Modified median frequency                      | $MMDF = \frac{1}{2} \sum_{j=1}^M A_j$                                                                                                                                                                                            | MMDF operates the same as MDF, but instead of power spectrum density, it is based on the amplitude spectrum ( $A_j$ ). MMDF divides the frequency spectrum into two intervals with the same amplitude.                                                                                                                                                                                                                                                                                                                        |
| <b>TTP, SM0</b> | Total power, zero spectral moment              | $TTP = \sum_{j=1}^M P_j$                                                                                                                                                                                                         | TTP concatenates the whole range of the EMG frequency-domain power spectrum into a single feature.                                                                                                                                                                                                                                                                                                                                                                                                                            |



|                |                                                                                 |                                                                                    |                                                                                                                                                                                                                                                                                                                                                                                                                                                            |
|----------------|---------------------------------------------------------------------------------|------------------------------------------------------------------------------------|------------------------------------------------------------------------------------------------------------------------------------------------------------------------------------------------------------------------------------------------------------------------------------------------------------------------------------------------------------------------------------------------------------------------------------------------------------|
| <b>MNPV</b>    | Mean power value of the EMG signal                                              | $MNP = \sum_{j=1}^M P_j / M$                                                       | MNP is the average value of the aggregated power spectrum of the EMG signal.                                                                                                                                                                                                                                                                                                                                                                               |
| <b>MDPV</b>    | Median power value of the EMG signal                                            | $MDP = \text{median}(P_j / M)$                                                     | MDP is the median power value of the EMG power spectrum.                                                                                                                                                                                                                                                                                                                                                                                                   |
| <b>PKF</b>     | Peak frequency                                                                  | $PKF = f_j, j = \max_j(P_j)$                                                       | PKF determines the EMG frequency which has the maximum signal power spectrum in a certain signal slot.                                                                                                                                                                                                                                                                                                                                                     |
| <b>FRT</b>     | Frequency ratio                                                                 | $FRT = \sum_{j=LLC}^{ULC} P_j / \sum_{j=LHC}^{UHC} P_j$                            | FRT is the correlation feature that is used for binary classification of the muscle state (relaxation and contraction). FRT is calculated by the division of the low and high-frequency bound components of the EMG signal as a variable. The high-low frequency bands and cutoff settings (UHC, LHC, ULC, and LLC) can be set empirically or assigned in relation to the mean frequency (MNF).                                                            |
| <b>PSR</b>     | Power spectrum ratio                                                            | $PSR = \frac{P_0}{P} = \sum_{j=f_0-n}^{f_0+n} P_j / \sum_{j=-\infty}^{\infty} P_j$ | PSR rates the values of the maximum EMG signal power parameter (PKF) versus the total frequency ratio of the energy slot (FRT). In the following equation, the $f_0$ is a PKF return value and $n$ is an integral EMG signal limit which was empirically set to 20, whereas the energy of $P$ was set to 10 and 500 Hz to reflect the typical range of muscle activity.                                                                                    |
| <b>LPSR</b>    | Logarithmic power spectrum ratio                                                | $LPSR = \log\left(\frac{P_0}{P}\right)$                                            | LPSR is PSR modification in which values are set to the logarithmic in order to decrease the size of the magnitude difference.                                                                                                                                                                                                                                                                                                                             |
| <b>SM1-3</b>   | Spectral moments (1 <sup>st</sup> , 2 <sup>nd</sup> , and the 3 <sup>rd</sup> ) | $SM_m = \sum_j^M (P_j f_j)^m, m = 1, 2, 3$                                         | SM1-3 performs frequency-domain power spectral density evaluation of the EMG signal. High-order statistical spectral moment analysis discloses non-linear and non-Gaussian properties of the EMG signal and is used in muscle fatigue evaluation.                                                                                                                                                                                                          |
| <b>SMN</b>     | Spectral mean density                                                           | $SMN = \frac{\sum_{j=1}^M f_j PSD_j}{\sum_{j=1}^M PSD_j}$                          | Keeping different statistical properties of power spectrum density (PSD) of the EMG signal in the discrete set or continuous function of frequency, SMD and SMN were used as alternative implementations of the MDF and MNF. SMD and SMN are arranged to describe the amount of PSD at a particular frequency during the observing mean and frequency density of the signal, in which the direct amplitude and frequency bin size ambiguity is foreclosed. |
| <b>SMD</b>     | Spectral median density                                                         | $SMD = \frac{1}{2} \sum_{j=1}^M PSD_j$                                             |                                                                                                                                                                                                                                                                                                                                                                                                                                                            |
| <b>FDD</b>     | Fundamental frequency standard deviation                                        | $FDD = \text{STD}(F_0)$                                                            | In the EMG practice, FDD observes the myoelectrical fundamental frequency standard deviation directly derived from the muscle signal and estimates its spectrum density information. $F_0$ is the fundamental frequency of muscle contraction.                                                                                                                                                                                                             |
| <b>FRHT2,4</b> | The frequency histogram of the EMG                                              |                                                                                    | FRHT is a distribution of the signal's power spectrum over the divided frequency amplitude bins, in which each segment contains the percentage of signal power. Since histogram-related features have adjustable parameters, we set bins to 2 and 4.                                                                                                                                                                                                       |
| <b>STFT</b>    | Short-time Fourier transform                                                    | $\text{STFT}(k, m) = \sum_{r=1}^{N-1} x(r)g(r-k)\epsilon^{-j2\pi m l/N}$           | STFT transforms the EMG signal spectrum wave into various magnitude characteristics and evaluates non-stationary parameters in the time-series scale. In the given description, $g$ is a window range function, whereas $k$ and $m$ reflect the signal's frequency and corresponding bins.                                                                                                                                                                 |

|                               |                                                  |                                                                                                                    |                                                                                                                                                                                                                                                                                                                                                                                                                            |
|-------------------------------|--------------------------------------------------|--------------------------------------------------------------------------------------------------------------------|----------------------------------------------------------------------------------------------------------------------------------------------------------------------------------------------------------------------------------------------------------------------------------------------------------------------------------------------------------------------------------------------------------------------------|
| <b>EWT</b><br><b>4,6,8,10</b> | The energy of wavelet coefficient                | $EWT = \sqrt{\frac{1}{K} \sum_{k=1}^K W_{j,k}^2}$                                                                  | EWT accumulates the coefficients obtained from the discrete wavelet transform of energy in the initial signal. In the mathematical definition, K is the number of the j <sup>th</sup> layer decomposed coefficient level, and W <sub>j,k</sub> is the k <sup>th</sup> coefficient of the given layer decomposed coefficients. The Db4, 6, 8, and 10 wavelets and five-layer decomposition we set in the following feature. |
| <b>EWP</b><br><b>4,6,8,10</b> | The energy of the wavelet packet coefficient     |                                                                                                                    | EWP as an extended version of EWT encompasses wider signal ranges through each high and low-pass band and thereby has more signal contents inside of coefficients. Since EWP coefficients are massive, the median value parameter was used as a feature.                                                                                                                                                                   |
| <b>ZCWC</b>                   | Zero crossing of the energy wavelet coefficients | $ZCWT = \sum_{j=1}^K u(-W_j W_{j+1})$                                                                              | ZCWC performs zero-crossings (ZC) evaluation of the signal in the predetermined wavelet decomposition settings (in our study we used Db6); u is a unit-step function parameter.                                                                                                                                                                                                                                            |
| <b>HHT</b>                    | Hilbert-Huang transform                          |                                                                                                                    | HHT is used for measuring non-stationary events (such as muscle fatigue monitoring), it comprises the signal empirical mode decomposition and original Hilbert transforms spectral function. HHT is one of the most frequently used timescale features since it is able to extract useful features in a short-time EMG signal energy.                                                                                      |
| <b>SWT</b>                    | Stockwell transform                              |                                                                                                                    | SWT is generated from the short-time Fourier transform and further wavelet decomposition that can adjust the window function settings during the signal analysis. Stockwell transform is used as a noise-gate feature in biomedical applications.                                                                                                                                                                          |
| <b>FRFT</b>                   | Fractional Fourier transform                     |                                                                                                                    | FRFT is the linear integral transform of the Fourier transform with the specific decomposition settings which return an equal number of the time-scale coefficients to the number of samples. It is shown that FRFT as a feature extraction method demonstrates efficient classification in gesture recognition.                                                                                                           |
| <b>DWT</b>                    | Discrete wavelet transform                       |                                                                                                                    | DWT function disintegrates the original signal into an approximation and itemizes obtained coefficients through low- and high-pass filters. The obtained coefficients are divided by next-level approximations which results in numerous components of lower resolution.                                                                                                                                                   |
| <b>WENT</b>                   | Wavelet entropy                                  | $E_m = \frac{\sum_{n=1}^N  C_m(n) ^2}{\sum_{m=1}^N \sum_{n=1}^N  C_m(n) ^2}$ $WENT = - \sum_{n=1}^N E_m \log(E_m)$ | WENT determines the degree of disorder that the signal values are possesses. This time-scale feature can provide useful information about the low-elemental complex processes tied to the initial EMG signal which is used in biomedical applications. In provided definition, m is the scale of the wavelet coefficients, E <sub>m</sub> expresses the energy of each time sample n.                                      |
| <b>SMAV</b>                   | Scaled mean absolute value                       | $SMAV = \frac{MAV_n}{\frac{\sum_{n=1}^{ch} MAV_n}{ch}}$                                                            | SMAV estimates the non-dimensional spatial relationships of EMG signals in between the channels, the results of which are stored as a space-domain feature. Spatial features eliminate the possible channel-specific excess signal intensity of the particular gesture by scaling the local MAV (in every single channel) by the average spatial mean value (obtained from all channels).                                  |
| <b>MSMAV</b>                  | Modified scaled mean absolute value              | $MSMAV = \frac{MAV_n}{\sqrt{SMAV}}$                                                                                | MSMAV is a SMAV function obtained using the root mean square of the mean of MAVs across all channels.                                                                                                                                                                                                                                                                                                                      |

|                 |                                                                                           |                                                                                                                                                                                                                   |                                                                                                                                                                                                                                                                                                                                                                         |
|-----------------|-------------------------------------------------------------------------------------------|-------------------------------------------------------------------------------------------------------------------------------------------------------------------------------------------------------------------|-------------------------------------------------------------------------------------------------------------------------------------------------------------------------------------------------------------------------------------------------------------------------------------------------------------------------------------------------------------------------|
| <b>CC-D</b>     | Correlation coefficient (CC) of the normalized values using median value                  | $CCD = \frac{\sum_{n=1}^N x_{ch}[n]x_{ch+1}[n]}{\text{median}(\sum_{n=1}^N x_{ch}[n]^2)}$                                                                                                                         | The correlation coefficients between the individual channels' mean values track the muscle cross-talk in order to estimate the myoelectrical source of certain gestures. Due to required normalization, the output mean absolute values of that function are divided by their standard deviation.                                                                       |
| <b>CC-S</b>     | CC of the normalized values using square root value                                       | $CCS = \frac{\sum_{n=1}^N x_{ch}[n]x_{ch+1}[n]}{\text{sqrt}(\sum_{n=1}^N x_{ch}[n]^2)}$                                                                                                                           | CC which are normalized with the median parameter of mean absolute value standard deviation.                                                                                                                                                                                                                                                                            |
| <b>CC-R</b>     | CC of the normalized values using root mean square value                                  | $CCR = \frac{\sum_{n=1}^N x_{ch}[n]x_{ch+1}[n]}{\text{rms}(\sum_{n=1}^N x_{ch}[n]^2)}$                                                                                                                            | CC which are normalized with the root mean square parameter of mean absolute value standard deviation.                                                                                                                                                                                                                                                                  |
| <b>RT4</b>      | Mean absolute difference of the normalized values as a spatial ratio of four EMG channels | $RT4 = \frac{MAV_{(ch1)}}{MAV_{(ch2)}} + \frac{MAV_{(ch1)}}{MAV_{(ch3)}} + \frac{MAV_{(ch1)}}{MAV_{(ch4)}} + \frac{MAV_{(ch2)}}{MAV_{(ch3)}} + \frac{MAV_{(ch2)}}{MAV_{(ch4)}} + \frac{MAV_{(ch3)}}{MAV_{(ch4)}}$ | Mean absolute difference of the absolute values between four EMG channels (RT4) as a metric of biomechanical relation between the muscles.                                                                                                                                                                                                                              |
| <b>FER-4</b>    | Ratio of absolute mean values between flexors and extensors                               | $RT4 = \frac{MAV_{(ch1)} + MAV_{(ch2)}}{MAV_{(ch3)}} + \frac{MAV_{(ch1)} + MAV_{(ch2)}}{MAV_{(ch4)}} + \frac{MAV_{(ch3)}}{MAV_{(ch4)}}$                                                                           | This hand-crafted feature examines the ratio of channels between flexors and extensors, normalized by the additional electrodes. Since each forearm and hand gesture has a specific biomechanical characteristic (and represents specific muscle pattern synergy), the certain antagonist's muscle behavior and its signal amplitude could specify pattern recognition. |
| <b>FRD, FR4</b> | Fractal dimension                                                                         | $FRD(k) = \frac{\left\{ \left( \sum_{n=1}^{N/k}  x(nk) - x((n-1)k)  \right) \frac{N-1}{N} \right\}}{k}$                                                                                                           | In terms of muscle behavior, the FRD feature designates the strength of muscle activity in which EMG parameters tend to have self-similarly during the scaling of the initial signal. k as a time-step was set to 4 in our study.                                                                                                                                       |
| <b>DFA</b>      | Detrended fluctuation analysis                                                            |                                                                                                                                                                                                                   | DFA is a non-linear fractal algorithm that analyses the non-stationary characteristics of the EMG which is applicable in noisy and low-grade signal evaluation for pattern recognition.                                                                                                                                                                                 |
| <b>HFD</b>      | Higuchi's fractal dimension                                                               |                                                                                                                                                                                                                   | In biomedical applications, HFD evaluates muscle strength and the contraction grade. This fractal function measures the size and complexity of the EMG signal in the time-domain spectrum without fractal attractor reconstruction methods.                                                                                                                             |

In a given data sample or segment, the EMG signal is represented by  $x_n$ , while N denotes the length of the EMG signal or window size. The amplitude spectrum of the signal in a particular frequency bin j, represented by  $A_j$ , is used to extract MMDF and other FD features. The power spectral density (PSD) is represented by SND. The frequency of the spectrum at frequency bin j is represented by  $F_j$ , while the EMG power spectrum at frequency bin j is represented by  $P_j$ . The length of the frequency bin is denoted by M.

| Table S2. Feature sets comparison in hemiplegic hand gesture classification by single feature classification |         |         |         |         |         |         |         |         |         |         |         |         |         |         |
|--------------------------------------------------------------------------------------------------------------|---------|---------|---------|---------|---------|---------|---------|---------|---------|---------|---------|---------|---------|---------|
| Feature                                                                                                      | CCR (%) | SD (%)  | Feature | CCR (%) | SD (%)  | Feature | CCR (%) | SD (%)  | Feature | CCR (%) | SD (%)  | Feature | CCR (%) | SD (%)  |
| IEMG                                                                                                         | 61.7143 | 11.1916 | RMSV2   | 54.4286 | 13.2675 | MYOP    | 51.7857 | 13.6351 | AEN     | 35.6429 | 9.3322  | EWT-6   | 59.3571 | 15.2521 |
| AAV                                                                                                          | 30.3571 | 9.8104  | LRMSV2  | 55.5000 | 15.1559 | ER      | 21.5000 | 7.8964  | FEN     | 30.4286 | 9.3941  | EWT-8   | 63.0714 | 13.1220 |
| MAV                                                                                                          | 54.5000 | 12.7474 | RMSV3   | 53.5000 | 15.6128 | LER     | 45.2857 | 14.2936 | PEN     | 27.2143 | 9.0062  | EWT-10  | 58.7857 | 12.1768 |
| LMAV                                                                                                         | 55.4286 | 16.9311 | LRMSV3  | 57.0000 | 14.8163 | MER     | 21.2857 | 7.9927  | MASP    | 60.5000 | 13.0195 | EWP-4   | 30.5714 | 12.3543 |
| MMAV1                                                                                                        | 54.4286 | 13.5747 | RSM0    | 62.8571 | 11.8396 | MLER    | 43.7143 | 14.9306 | MLASP   | 60.4286 | 12.6974 | EWP-6   | 33.2857 | 9.8022  |
| MMAV2                                                                                                        | 54.0714 | 14.3668 | RSD1    | 61.2143 | 15.2034 | MXER    | 22.1429 | 8.9951  | MNF     | 27.5714 | 10.5517 | EWP-8   | 27.7857 | 9.0746  |
| MMAV3                                                                                                        | 53.6429 | 12.6190 | RSD2    | 59.6429 | 14.0447 | LMXER   | 40.4286 | 12.4846 | MMNF    | 23.9286 | 10.7623 | EWP-10  | 27.9286 | 9.0291  |
| MMAV4                                                                                                        | 53.2143 | 14.0813 | MSR     | 55.7143 | 13.9573 | MHW     | 62.2143 | 9.3763  | MDF     | 28.7143 | 8.9652  | ZCWC-6  | 32.7143 | 10.0082 |
| MMAV5                                                                                                        | 56.2857 | 13.2480 | ASM     | 54.0714 | 13.9667 | MTW     | 58.6429 | 13.5562 | MMDF    | 24.7857 | 11.0028 | HHT     | 61.3571 | 11.5352 |
| MMAV6                                                                                                        | 55.0714 | 14.9311 | MAPN    | 54.7857 | 15.1627 | AHT     | 35.3571 | 9.2144  | TTP     | 48.6429 | 14.3826 | SWT     | 31.0000 | 11.2238 |
| MAVS                                                                                                         | 24.2143 | 8.3036  | SD      | 53.8571 | 11.6386 | SAHT    | 36.5714 | 9.2649  | MNP     | 48.3571 | 14.4954 | FRFT    | 52.5000 | 14.8993 |
| EMAV                                                                                                         | 57.1429 | 14.3577 | LOG     | 55.6429 | 12.7733 | AR2     | 24.8571 | 11.3725 | MND     | 55.1429 | 14.2886 | DWT     | 60.0000 | 13.9941 |
| SSI                                                                                                          | 61.0714 | 12.4497 | ROG     | 57.5000 | 13.0952 | AR3     | 33.3571 | 11.3078 | PKF     | 29.0000 | 11.0199 | WENT    | 55.2143 | 13.6154 |
| LSSI                                                                                                         | 56.7857 | 11.7687 | MDPV    | 55.7857 | 17.9240 | AR4     | 31.4286 | 14.1771 | FRT     | 25.5000 | 9.4289  | SMAV    | 52.2143 | 13.2252 |
| VAR                                                                                                          | 56.4286 | 13.1394 | MPDV    | 58.4286 | 15.6090 | AR5     | 33.8571 | 14.2720 | PSR     | 26.4286 | 12.8620 | MSMAV   | 57.7143 | 14.7010 |
| LVAR                                                                                                         | 54.0714 | 13.4402 | DASDV   | 55.2143 | 13.1534 | AR6     | 33.4286 | 14.4607 | LPSR    | 26.7857 | 11.2309 | CC-D    | 57.0714 | 12.8216 |
| HPM                                                                                                          | 26.3571 | 9.9832  | MFL     | 58.4286 | 16.1605 | CCAR    | 32.1429 | 13.7527 | SM1     | 47.2143 | 16.9243 | CC-S    | 29.3571 | 6.2497  |
| HPC                                                                                                          | 28.4286 | 9.1923  | WL      | 62.0714 | 13.3799 | LPC2    | 25.3571 | 10.4217 | SM2     | 51.5000 | 17.0577 | CC-R    | 58.2143 | 11.5922 |
| TM3                                                                                                          | 52.2857 | 14.7780 | WLR     | 21.6429 | 10.2763 | LPC3    | 30.4286 | 13.0655 | SM3     | 52.0000 | 15.2313 | RT-4    | 43.5000 | 11.7564 |
| TM4                                                                                                          | 39.4286 | 11.4628 | AAC     | 55.5000 | 16.0156 | LPC4    | 35.1429 | 10.9665 | SMN     | 45.8571 | 12.1905 | FER-4   | 42.0714 | 10.5943 |
| TM5                                                                                                          | 32.3571 | 9.2746  | EWL     | 51.0000 | 15.9887 | LPC5    | 32.4286 | 9.4924  | SMD     | 47.6429 | 13.4708 | FR4     | 63.9286 | 10.6176 |
| MSKEW1                                                                                                       | 30.9286 | 12.9241 | NSV     | 61.4286 | 14.6772 | LPC6    | 31.6429 | 11.4527 | FDD     | 22.9286 | 11.0887 | DFA     | 57.2857 | 11.9255 |
| MSKEW2                                                                                                       | 56.3571 | 17.6983 | ZC      | 54.9286 | 19.1204 | LCARD   | 59.0000 | 15.4176 | FTHT2   | 32.5000 | 9.7577  | HFD5    | 28.6429 | 10.5749 |
| MSKEW3                                                                                                       | 35.1429 | 13.4947 | SSC     | 51.2143 | 19.2107 | PERC1   | 55.8571 | 13.6353 | FTHT4   | 30.2857 | 9.2560  |         |         |         |
| KURT                                                                                                         | 30.8571 | 6.5701  | IRF     | 50.5000 | 17.4449 | PERC2   | 55.4286 | 12.8065 | STFT    | 60.7857 | 11.2822 |         |         |         |
| MKURT                                                                                                        | 39.5000 | 12.4530 | WAMP    | 56.0000 | 17.5763 | SEN     | 26.3571 | 9.5613  | EWT-4   | 58.2857 | 14.0573 |         |         |         |

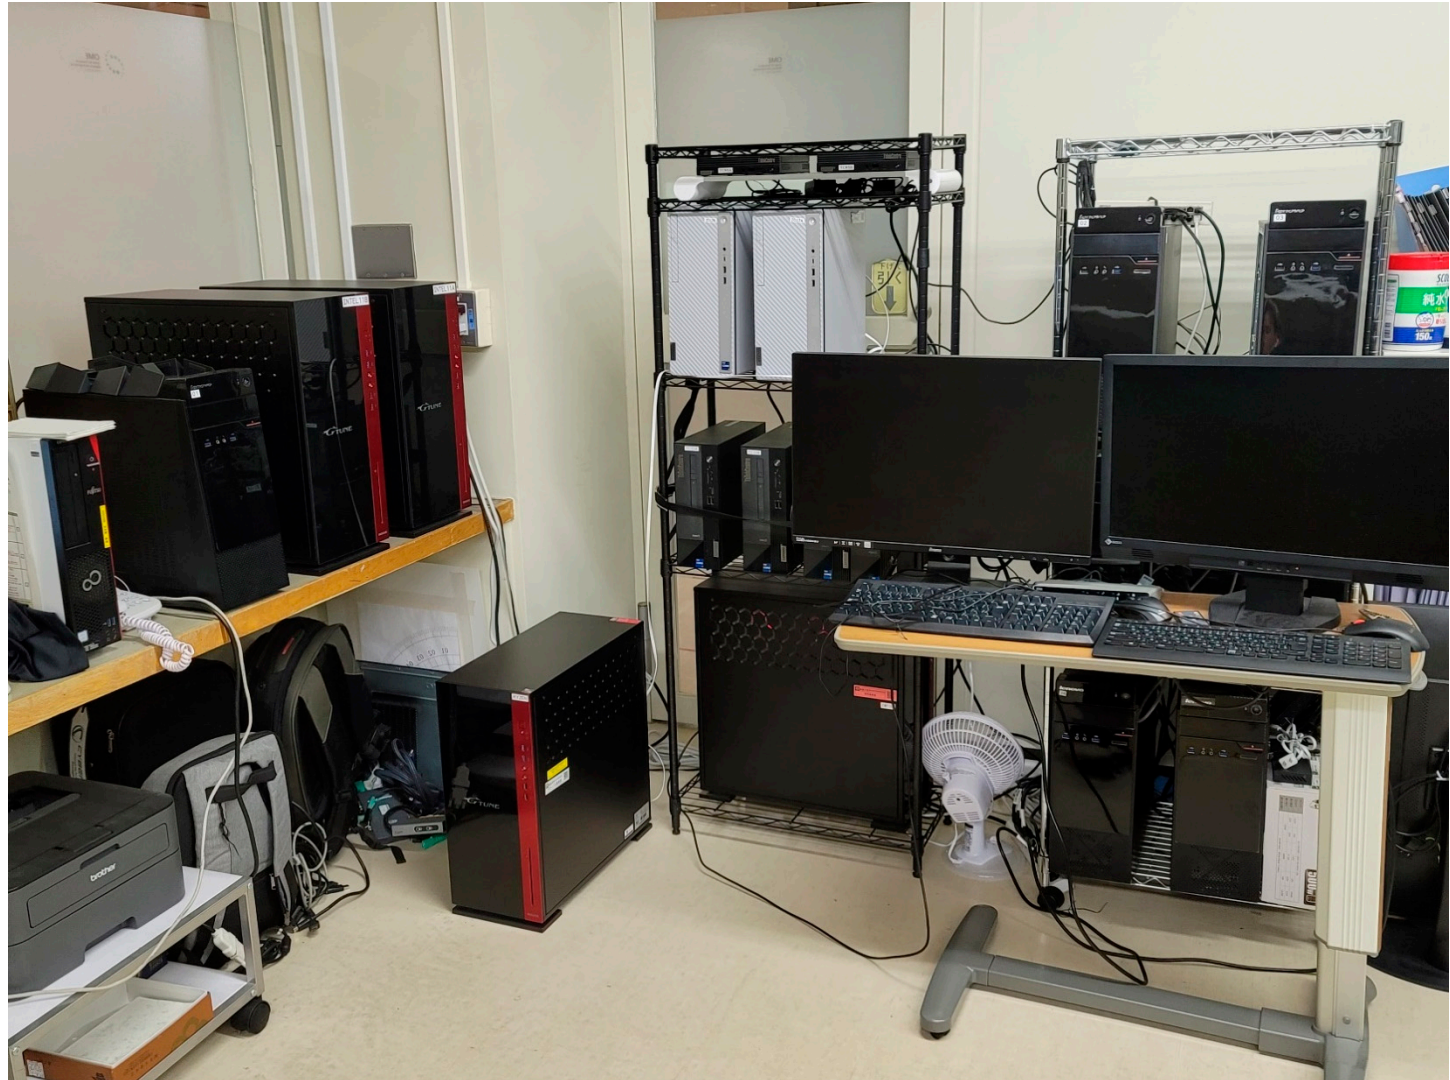

**Figure S1. Custom-made consumer-type parallel computing cluster or “3C cluster”.** The SVM cross-validation was performed using the EMG dataset of 19 acute stroke patients with various grades of upper extremity paresis specified.

**Table S3. Feature set comparison in hemiplegic hand gesture prediction ( $n = 100$  and equals to the number of 10-fold cross-validations) using SBFS5.**

| Feature set | CCR (%) | SD (%)  | DF  | $p$ -Value                    |
|-------------|---------|---------|-----|-------------------------------|
| SBFS5       | 69.5000 | 12.5929 | --- | ---                           |
| MFS1        | 60.5000 | 13.4478 | 198 | $2.1284 \times 10^{-6}$ ****  |
| MFS2        | 47.7857 | 16.4862 | 198 | $1.0926 \times 10^{-20}$ **** |
| MFS3        | 57.5714 | 16.2064 | 198 | $2.4360 \times 10^{-8}$ ****  |
| MFS4        | 57.5000 | 15.1395 | 198 | $5.6569 \times 10^{-9}$ ****  |
| MFS5        | 60.4286 | 12.5340 | 198 | $7.7153 \times 10^{-7}$ ****  |
| MFS6        | 55.1429 | 14.3606 | 198 | $1.9001 \times 10^{-12}$ **** |
| MFS7        | 53.2143 | 13.7105 | 198 | $9.4246 \times 10^{-16}$ **** |
| MFS8        | 55.5714 | 13.3372 | 198 | $1.2035 \times 10^{-12}$ **** |

\*\*\*\* shows significance with  $p < 0.0001$ . SBFS—semi-brute-force search, MFSs—multi-domain feature sets, SD—standard deviation, CCR—mean correct classification rate, and DF—degree of freedom during the unpaired  $t$ -test.
